# Supplementary material
Source: PubMed Central journal article supplement (PMC9074121)
Supplement: NIHMS1798834-supplement-SI.pdf [file NIHMS1798834-supplement-SI.pdf]

# Supporting information for: Molecular Paradigms for Biological Mechanosensing

David Gomez,<sup>†,‡</sup> Willmor J. Peña Ccoa,<sup>‡</sup> Yuvraj Singh,<sup>‡</sup> Enrique Rojas,<sup>†</sup> and  
Glen M. Hocky<sup>\*,‡</sup>

<sup>†</sup>*Department of Biology, New York University, New York, NY 10003*

<sup>‡</sup>*Department of Chemistry, New York University, New York, NY 10003*

E-mail: hockyg@nyu.edu

## Simple derivation of linear response result

In Eq. 2, we can replace  $Q(X)$  with  $\delta Q(X)$  by multiplying the top and bottom by  $e^{-\beta F Q_0(X)}$ , and then compute the average of  $\delta Q$  itself using Eq. 3, which gives

$$\langle \delta Q \rangle_F = \frac{\int dX \delta Q(X) e^{-\beta U(X) + \beta F \delta Q(X)}}{\int dX e^{-\beta U(X) + \beta F \delta Q(X)}}. \quad (\text{S1})$$

We can multiply the top and bottom by  $Z_0^{-1}$ , where  $Z_0 = \int dX e^{-\beta U(X)}$ . Note in the following that  $\langle \delta Q(X) \rangle_0 = 0$  and  $\langle (\delta Q(X))^2 \rangle_0 \equiv \sigma_Q^2$

Expanding the exponential for small  $\beta F \delta Q(X)$  gives,

$$\langle \delta Q \rangle_F = \frac{\int dX \delta Q(X) e^{-\beta U(X)} (1 + \beta F \delta Q(X) + \frac{1}{2} (\beta F \delta Q(X))^2 + \dots)}{\int dX e^{-\beta U(X)} (1 + \beta F \delta Q(X) + \frac{1}{2} (\beta F \delta Q(X))^2 + \dots)} \quad (\text{S2})$$

$$= \frac{\langle \delta Q \rangle_0 + \beta F \langle \delta Q(X) \delta Q(X) \rangle_0 + \frac{1}{2} (\beta F)^2 \langle Q(X) (\delta Q(X))^2 \rangle_0 + \dots}{\langle 1 \rangle_0 + \beta F \langle \delta Q(X) \rangle_0 + \frac{1}{2} (\beta F)^2 \langle (\delta Q(X))^2 \rangle_0 + \dots} \quad (\text{S3})$$

$$= \beta F \sigma_Q^2, \quad (\text{S4})$$

where the last term follows from neglecting all terms  $O(F^2)$ , resulting in Eq. 4,

$$\langle \delta Q \rangle_F = \langle Q - \langle Q \rangle_0 \rangle_F = \beta F \sigma_Q^2. \quad (\text{S5})$$

We can also ask what the effect of a force along vector  $Q$  is on another quantity  $\delta Q'(X) = Q'(X) - \langle Q'(X) \rangle_0$ . In exactly analogous fashion, we arrive at equation Eq. 6,

$$\langle \delta Q' \rangle_F = \beta F \langle \delta Q'(X) \delta Q(X) \rangle_0 \equiv \beta F \text{Cov}(Q', Q) \quad (\text{S6})$$

Similar results have been derived before, for example in Ref. 1.

## Effect of force on equilibrium constants

The equilibrium constant in a two state system is given by  $K_{eq} = P(R)/P(L)$ , where  $L$  and  $R$  are the left and right states in a two-state model, as in Fig. 3.

The probability of being in a state  $A$  can be defined using a characteristic function<sup>2</sup>

$$\chi_A(\vec{X}) = \begin{cases} 1 & \vec{X} \in A \\ 0 & \text{otherwise} \end{cases}$$

The probability of being in a state  $A$  is given by

$$P(A) = \langle \chi_A \rangle = \frac{\int d\vec{X} \chi_A(\vec{X}) e^{-\beta U(\vec{X})}}{\int d\vec{X} e^{-\beta U(\vec{X})}} \quad (\text{S7})$$

For the 1D problem in Fig. 3, this simplifies to

$$P(A) = \langle \chi_A \rangle = \frac{\int dQ \chi_A(Q) e^{-\beta U(Q)}}{\int dQ e^{-\beta U(Q)}} \quad (\text{S8})$$

We can take a very strict definition of state  $R$  and  $L$  such that the system is only in the state if  $Q$  is precisely at the minimum. In this case, we can define the characteristic functions  $\chi_R = \delta(Q - Q_R)$  and  $\chi_L = \delta(Q - Q_L)$ , with  $\delta$  the Dirac delta function.

With this definition,

$$K_{eq} = \frac{P(R)}{P(L)} = \frac{\int dQ \delta(Q - Q_R) e^{-\beta U(Q)}}{\int dQ \delta(Q - Q_L) e^{-\beta U(Q)}} = \frac{e^{-\beta U(Q_R)}}{e^{-\beta U(Q_L)}} = e^{-\beta(U(Q_R) - U(Q_L))} \quad (\text{S9})$$

The Helmholtz free energy of a state  $A$  is given by  $F(A) = -k_B T \ln(P(A))$ , and so the difference in free-energies between the states at constant temperature is given by

$$\Delta F = F(R) - F(L) = -k_B T \ln \left( \frac{P(R)}{P(L)} \right) = -k_B T \ln K_{eq} = U(Q_R) - U(Q_L). \quad (\text{S10})$$

The fact that the free energy difference is equal to the energy difference is reflective of the fact that we are considering only a one-dimensional problem.

## Simulation details

MD simulations in Fig. 1 and Fig. 2 were performed in Gromacs<sup>3</sup> at  $T = 300K$  with a timestep of  $dt = 2\text{fs}$ . Lysozyme was started from the PDB structure 1AKI using the CHARMM36 forcefield,<sup>4</sup> solvated in TIP3P water, and neutralized with chloride ions. Production MD was performed with the Parrinello-Rahman barostat and the v-rescale ther-

mostat. Data was taken from 60 to 110 ns of simulation time. HP35 was started from the PDB structure 1YRF and prepared for simulation using CHARMM-GUI<sup>5</sup> using the CHARMM36m forcefield with TIP3P water,<sup>6</sup> and was neutralized and ionized with 50 mMol KCl. Production MD was performed with the Parrinello-Rahman barostat and Nose-Hoover thermostat. Data was taken from times 550ns to 600ns of production MD. Open structures in Fig. 8B were taken from preliminary simulations using Plumed<sup>7</sup> with an applied 200pN constant force for the intermediate structure, and a simulation at 500K run with FISST<sup>8</sup> for the fully extended structure. Trp-cage simulations were started from the PDB structure 2JOF and solvated in TIP3P water, using the Amber99SB\*-ILDN forcefield.<sup>9,10</sup> Production MD was performed with the Parrinello-Rahman barostat and the v-rescale thermostat. MD data was taken from the final 50ns of a 1 microsecond MD simulation.

## References

- (1) Ikeguchi, M.; Ueno, J.; Sato, M.; Kidera, A. Protein structural change upon ligand binding: linear response theory. *Phys. Rev. Lett.* **2005**, *94*, 078102.
- (2) Chandler, D. *Introduction to modern statistical*; Oxford University Press, 1987.
- (3) Abraham, M. J.; Murtola, T.; Schulz, R.; Páll, S.; Smith, J. C.; Hess, B.; Lindahl, E. GROMACS: High performance molecular simulations through multi-level parallelism from laptops to supercomputers. *SoftwareX.* **2015**, *1*, 19–25.
- (4) Huang, J.; MacKerell Jr, A. D. CHARMM36 all-atom additive protein force field: Validation based on comparison to NMR data. *J. Comp. Chem.* **2013**, *34*, 2135–2145.
- (5) others,, et al. CHARMM-GUI 10 years for biomolecular modeling and simulation. *J. Comp. Chem.* **2017**, *38*, 1114–1124.
- (6) Huang, J.; Rauscher, S.; Nawrocki, G.; Ran, T.; Feig, M.; De Groot, B. L.;

- Grubmüller, H.; MacKerell, A. D. CHARMM36m: an improved force field for folded and intrinsically disordered proteins. *Nat. Methods* **2017**, *14*, 71–73.
- (7) others,, et al. Promoting transparency and reproducibility in enhanced molecular simulations. *Nat. Methods* **2019**, *16*, 670–673.
- (8) Hartmann, M. J.; Singh, Y.; Vanden-Eijnden, E.; Hocky, G. M. Infinite switch simulated tempering in force (FISST). *J. Chem. Phys.* **2020**, *152*, 244120.
- (9) Lindorff-Larsen, K.; Piana, S.; Palmo, K.; Maragakis, P.; Klepeis, J. L.; Dror, R. O.; Shaw, D. E. Improved side-chain torsion potentials for the Amber ff99SB protein force field. *Proteins*. **2010**, *78*, 1950–1958.
- (10) Best, R. B.; Hummer, G. Optimized molecular dynamics force fields applied to the helix- coil transition of polypeptides. *J. Phys. Chem. B.* **2009**, *113*, 9004–9015.
